# Supplementary material for: Structural variation of centromeric endogenous retroviruses in human populations and their impact on cutaneous T-cell lymphoma, Sézary syndrome, and HIV infection
Source: PubMed Central journal article supplement (PMC6498702; doi:10.1186/s12920-019-0505-8), 2019-05-02

3p25.3

+/- K111

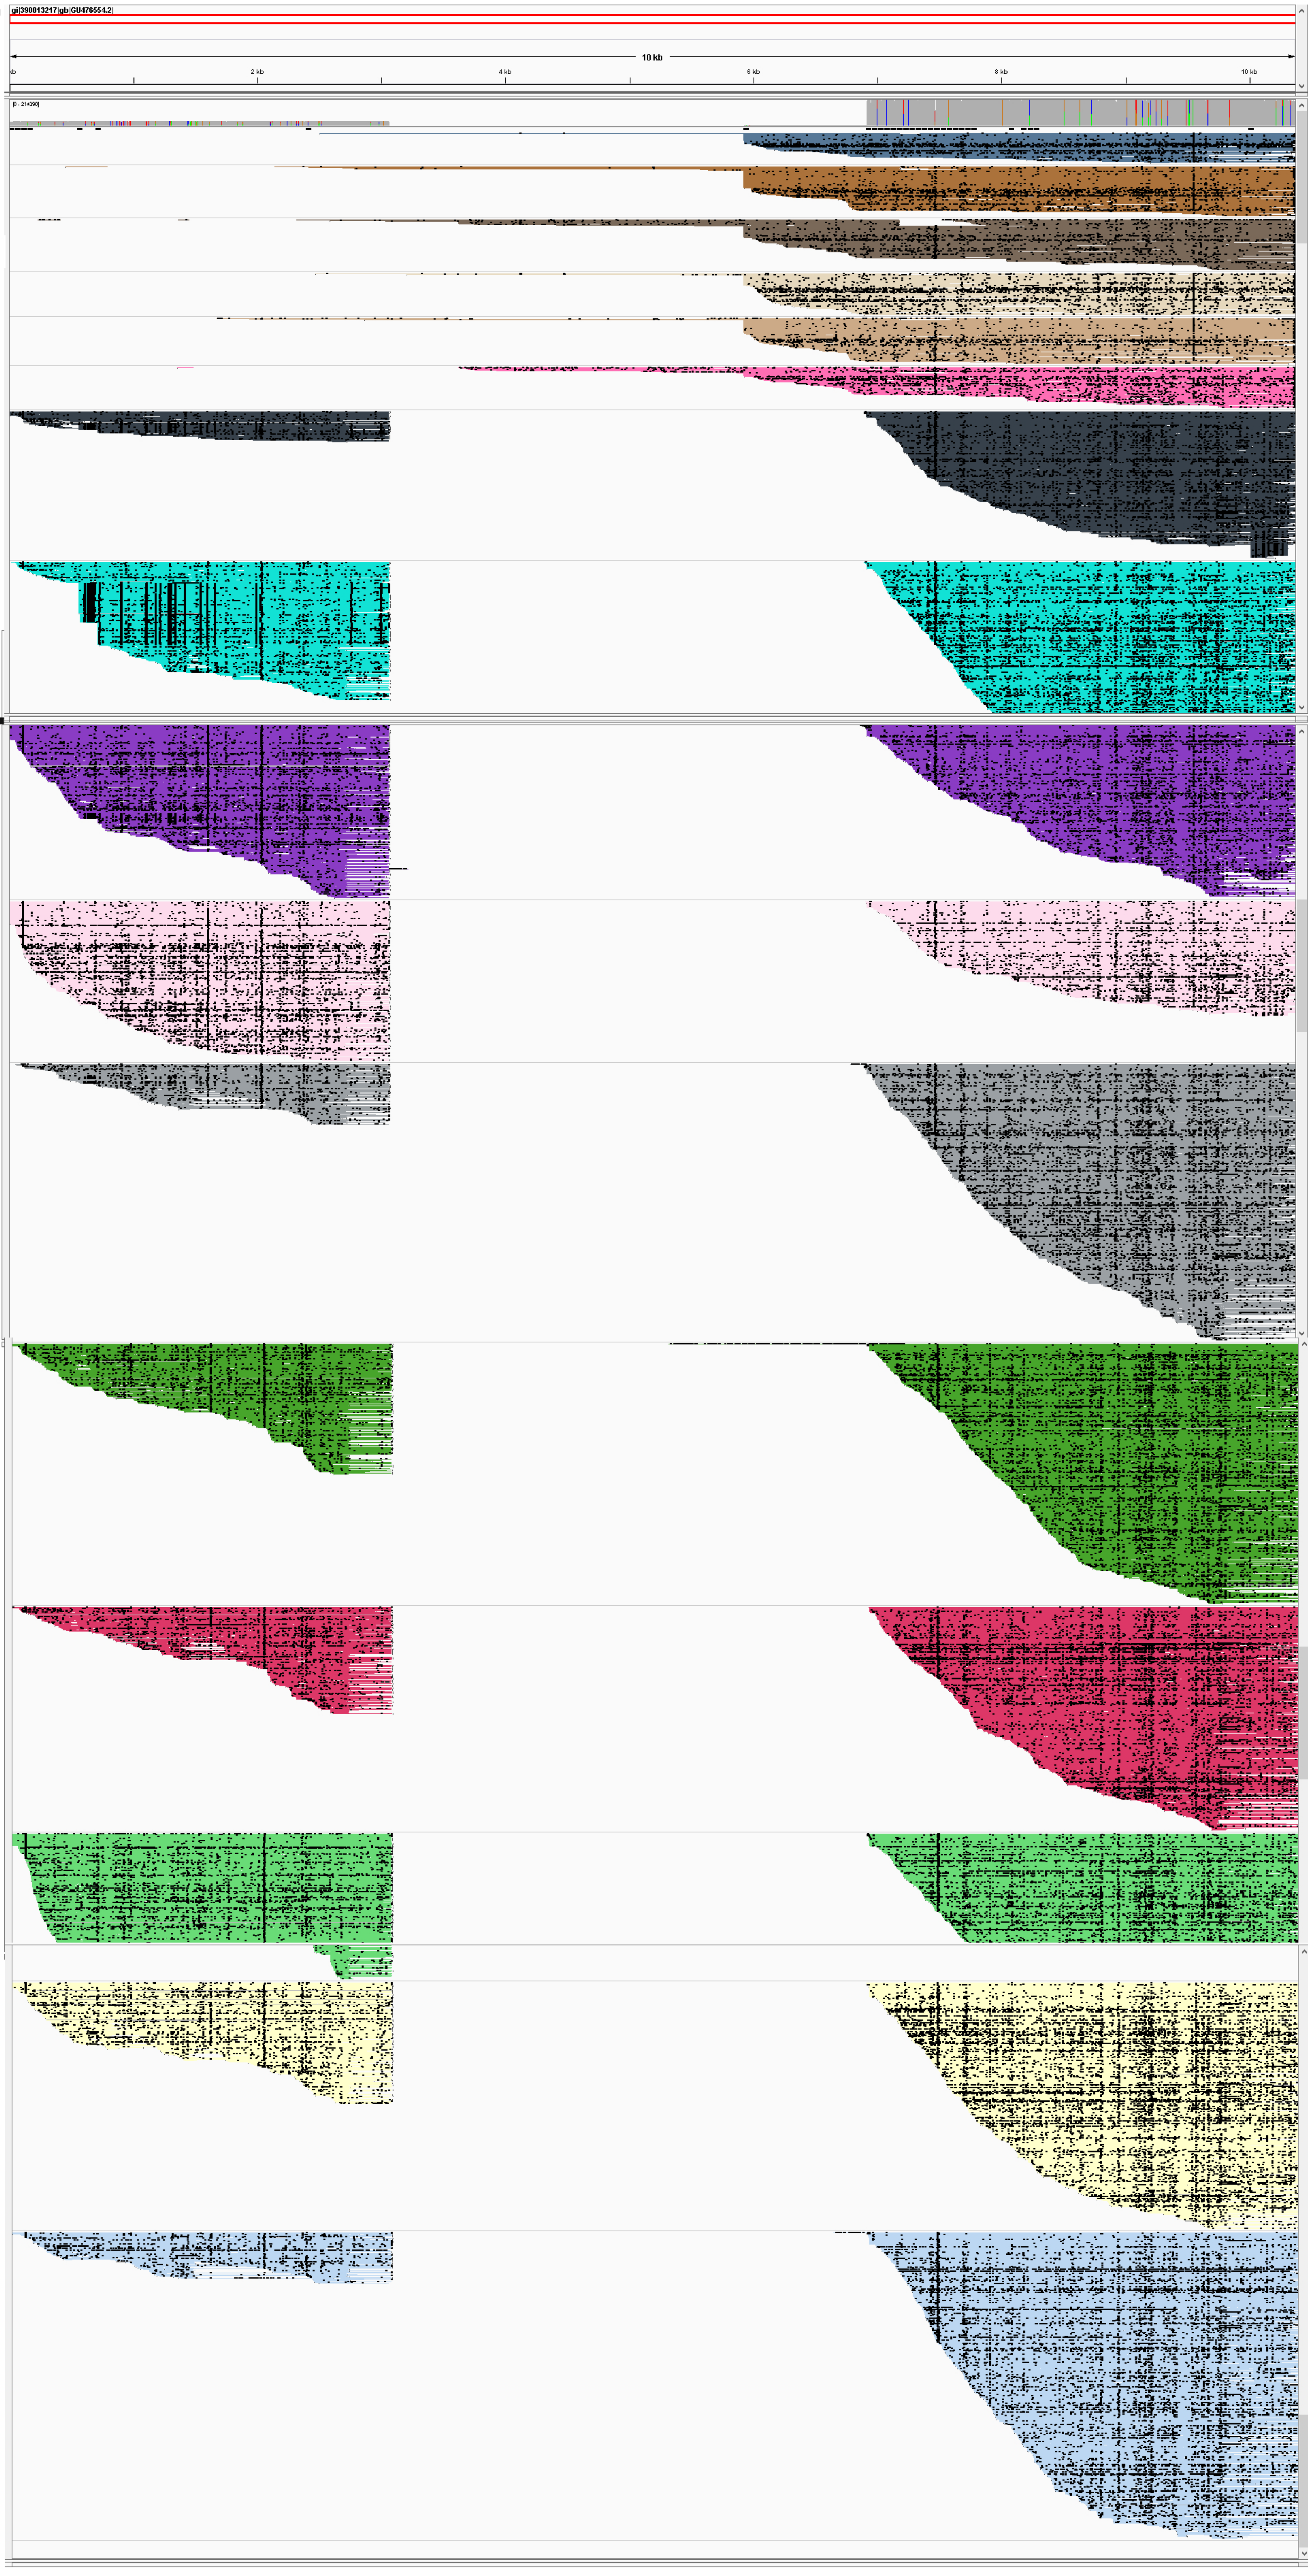

Supplement: 12920_2019_505_MOESM3_ESM.pdf [file 12920_2019_505_MOESM3_ESM.pdf]
